# Supplementary material for: Effectiveness and safety of camrelizumab in inoperable or advanced non-small cell lung cancer patients: a multicenter real-world retrospective observational study (CTONG2004-ADV)
Source: PubMed Central journal article supplement — Transl Lung Cancer Res. 2023 Jan 16;12(1):127–40. doi: 10.21037/tlcr-22-852 (PMC9903092; doi:10.21037/tlcr-22-852), 2023-01-16
Supplement: tlcr-12-01-127-dss.pdf [file tlcr-12-01-127-dss.pdf]

## Data Sharing Statement

|                     |                                                                                                                                                     |                                                                                                                                      |
|---------------------|-----------------------------------------------------------------------------------------------------------------------------------------------------|--------------------------------------------------------------------------------------------------------------------------------------|
| <b>Article Info</b> | <a href="https://dx.doi.org/10.21037/tlcr-22-852">https://dx.doi.org/10.21037/tlcr-22-852</a>                                                       |                                                                                                                                      |
| <b>Item</b>         | <b>Question</b>                                                                                                                                     | <b>Authors' Response<br/>(place "-" if not applicable)</b>                                                                           |
| 1                   | Would you like to share data collected for your study to others?                                                                                    | Yes.                                                                                                                                 |
| 2                   | If not, would you like to share the reason for your decision?                                                                                       | -                                                                                                                                    |
| 3                   | What data in particular will be shared?                                                                                                             | All data collected for analysis.                                                                                                     |
| 4                   | Any other documents will be shared? Such as study protocol, statistical analysis plan, informed consent form, clinical study report, analytic code. | -                                                                                                                                    |
| 5                   | When will data availability begin?                                                                                                                  | From the publication date.                                                                                                           |
| 6                   | When will data availability end?                                                                                                                    | Two years within the publication date.                                                                                               |
| 7                   | To whom will you share the data?                                                                                                                    | To the ones who will make a reasonable request.                                                                                      |
| 8                   | For what type of analysis or purpose?                                                                                                               | For analysis to evaluate the effectiveness and safety of camrelizumab in inoperable or advanced non-small cell lung cancer patients. |
| 9                   | How or where can the data/documents be obtained?                                                                                                    | By mailing the corresponding author.                                                                                                 |
| 10                  | Any other restrictions?                                                                                                                             | We may balance the potential benefits and risks for each request and then provide the data that could be shared.                     |
