# Supplementary material for: Effectiveness and safety of camrelizumab in inoperable or advanced non-small cell lung cancer patients: a multicenter real-world retrospective observational study (CTONG2004-ADV)
Source: PubMed Central journal article supplement — Transl Lung Cancer Res. 2023 Jan 16;12(1):127–40. doi: 10.21037/tlcr-22-852 (PMC9903092; doi:10.21037/tlcr-22-852), 2023-01-16
Supplement: tlcr-12-01-127-supplementary.pdf [file tlcr-12-01-127-supplementary.pdf]

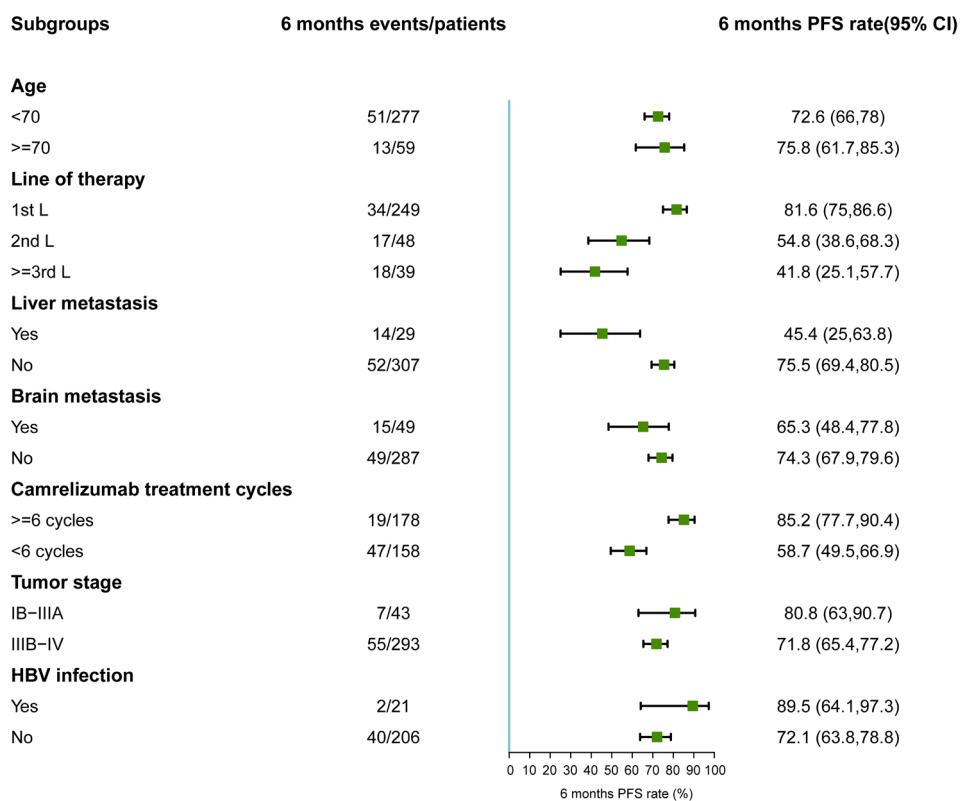

**Figure S1** Subgroup analysis of 6-month PFS in NSCLC patients treated with camrelizumab. PFS, progression-free survival; CI, confidence interval; NSCLC, non-small cell lung cancer.

**Table S1** COX regression analysis of PFS in patients treated with camrelizumab

| Variables                    | Univariate analysis |        | Multivariate analysis |        |
|------------------------------|---------------------|--------|-----------------------|--------|
|                              | HR (95% CI)         | P      | HR (95% CI)           | P      |
| Camrelizumab treatment line  |                     |        |                       |        |
| First line                   | Ref                 |        |                       |        |
| Second line                  | 3.12 (1.822–5.342)  | <0.001 | 2.177 (1.238–3.828)   | 0.007  |
| ≥ Third line                 | 5.074 (2.984–8.626) | <0.001 | 7.533 (4.308–13.172)  | <0.001 |
| Age                          |                     |        |                       |        |
| <70 years                    | Ref                 |        |                       |        |
| ≥70 years                    | 1.226 (0.709–2.119) | 0.467  |                       |        |
| Sex                          |                     |        |                       |        |
| Male                         | Ref                 |        |                       |        |
| Female                       | 1.335 (0.829–2.152) | 0.235  |                       |        |
| Histology                    |                     |        |                       |        |
| Adenocarcinoma               | Ref                 |        |                       |        |
| Squamous cell carcinoma      | 1.027 (0.655–1.61)  | 0.908  |                       |        |
| Other/unspecified            | 0.769 (0.187–3.167) | 0.716  |                       |        |
| Smoking status               |                     |        |                       |        |
| Never                        | Ref                 |        |                       |        |
| Current/former               | 0.855 (0.54–1.353)  | 0.504  |                       |        |
| Brain metastasis             |                     |        |                       |        |
| No                           | Ref                 |        |                       |        |
| Yes                          | 1.408 (0.803–2.469) | 0.232  |                       |        |
| Liver metastasis             |                     |        |                       |        |
| No                           | Ref                 |        |                       |        |
| Yes                          | 2.958 (1.662–5.268) | <0.001 | 2.416 (1.27–4.595)    | 0.007  |
| Baseline antibiotics         |                     |        |                       |        |
| No                           | Ref                 |        |                       |        |
| Yes                          | 0.806 (0.371–1.75)  | 0.585  |                       |        |
| Baseline steroids            |                     |        |                       |        |
| No                           | Ref                 |        |                       |        |
| Yes                          | 0.871 (0.534–1.422) | 0.581  |                       |        |
| Tumor stage                  |                     |        |                       |        |
| IB–IIIA                      | Ref                 |        |                       |        |
| IIIB–IV                      | 1.515 (0.73–3.144)  | 0.265  |                       |        |
| Duration of camrelizumab use |                     |        |                       |        |
| <6 cycles                    | Ref                 |        |                       |        |
| ≥6 cycles                    | 0.253 (0.155–0.414) | <0.001 | 0.192 (0.114–0.325)   | <0.001 |
| Patterns of camrelizumab use |                     |        |                       |        |
| Monotherapy                  | Ref                 |        |                       |        |
| Plus CT                      | 0.365 (0.192–0.696) | 0.002  |                       |        |
| Plus anti-angiogenesis       | 0.731 (0.328–1.629) | 0.444  |                       |        |
| Plus CT + anti-angiogenesis  | 0.352 (0.163–0.762) | 0.008  |                       |        |

PFS, progression-free survival; HR, hazard ratio; CI, confidence interval; CT, chemotherapy.
